# Supplementary material
Source: PubMed Central journal article supplement (PMC3937686)
Supplement: supp_M113.543637_jbc.M113.543637-1.pdf [file supp_M113.543637_jbc.M113.543637-1.pdf]

SUPPLEMENTAL DATA (Yang et al.)

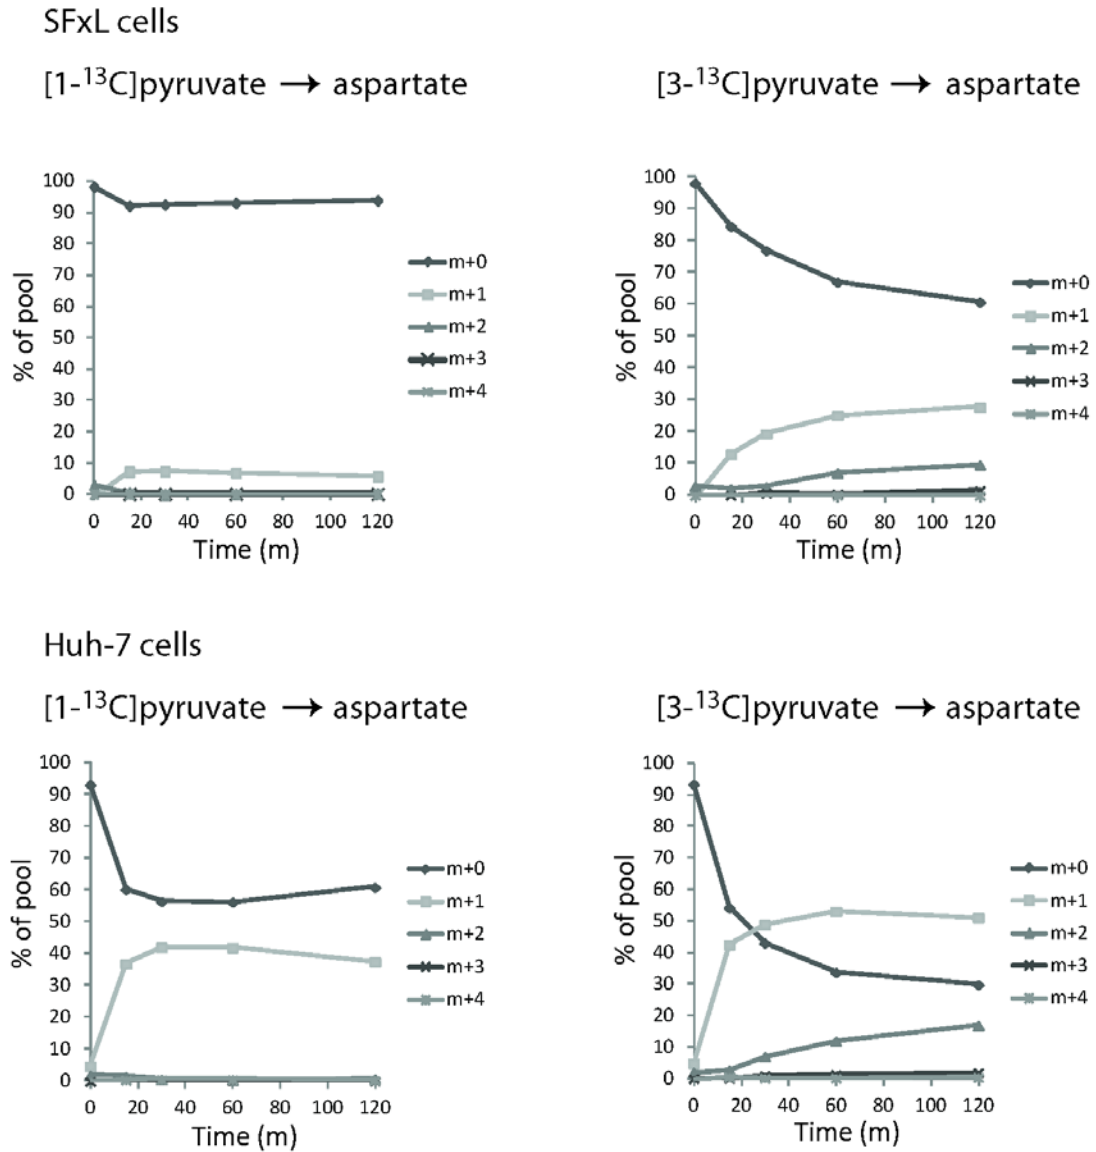

**FIGURE S1: Aspartate labeling in SF<sub>x</sub>L and Huh-7 cells.** Labeling of aspartate was monitored by GC/MS in cultures of SF<sub>x</sub>L and Huh-7 cells containing [1-<sup>13</sup>C]pyruvate or [3-<sup>13</sup>C]pyruvate. These cultures are the same as those used to monitor labeling in citrate in Figure 2.

**A**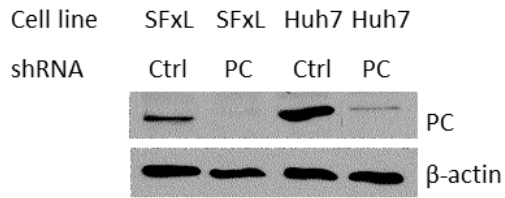**B**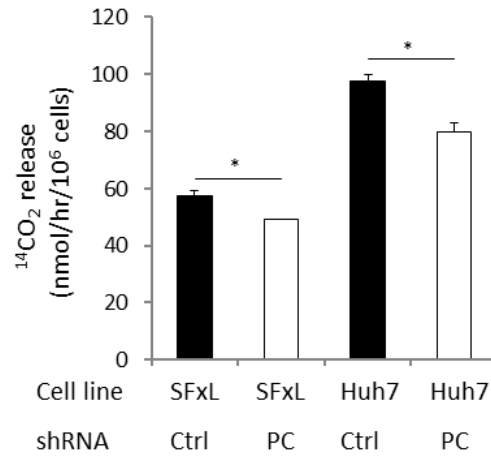

**FIGURE S2: Pyruvate carboxylase contributes to  $^{14}\text{CO}_2$  release from  $[1-^{14}\text{C}]$ pyruvate.** A. Western blot of SFxL and Huh7 cells expressing a non-targeting shRNA or an shRNA against pyruvate carboxylase (PC). Lentiviral shRNAs were described in (24). B.  $^{14}\text{CO}_2$  release in the absence and presence of the PC shRNA. Data are the average and S.D. of three incubations. \*,  $p < 0.05$
